# Supplementary material
Source: PubMed Central journal article supplement (PMC5823261)
Supplement: NIHMS942137-supplement-supplement_1.pdf [file NIHMS942137-supplement-supplement_1.pdf]

**Supplemental Table 1.** Baseline characteristics of JHS participants stratified by inclusion versus exclusion from the study cohort. Values are mean (standard deviation), median (interquartile range) or number (%). Abbreviations: body mass index, BMI; cardiovascular disease, CVD; high density lipoprotein, HDL; interquartile range, IQR; low density lipoprotein, LDL; number, N; standard deviation, SD.

|                                                    | <b>Included<br/>n = 2893</b> | <b>Excluded<br/>n = 2413</b> | <b>p value</b> |
|----------------------------------------------------|------------------------------|------------------------------|----------------|
| Age, mean (SD), years                              | 55.4 ± 9.4                   | 55.2 ± 16.1                  | 0.58           |
| Female, N (%)                                      | 1884 (65.1)                  | 1487 (61.6)                  | 0.008          |
| BMI, mean (SD), kg/m <sup>2</sup>                  | 31.6 ± 7.0                   | 31.9 ± 7.5                   | 0.58           |
| Current smoking, N (%)                             | 373 (12.9)                   | 320 (13.5)                   | 0.50           |
| Hypertension, N (%)                                | 1546 (53.4)                  | 1450 (60.1)                  | <0.0001        |
| Diabetes, N (%)                                    | 451 (15.6)                   | 694 (29.6)                   | <0.0001        |
| CVD History, N (%)                                 | 0                            | 572 (23.7)                   | <0.0001        |
| Family history of premature heart disease, N (%)   | 704 (24.5)                   | 600 (25.2)                   | 0.57           |
| Statin therapy, N (%)                              | 0                            | 573 (28.6%)                  | <0.0001        |
| Antihypertensive therapy, N (%)                    | 1362 (47.1)                  | 1380 (58.4)                  | <0.0001        |
| Total cholesterol, mean (SD), mg/dl                | 202.3 ± 39.3                 | 194.8 ± 40.8                 | <0.0001        |
| LDL, mean (SD), mg/dl                              | 129.5 ± 36.5                 | 122.2 ± 36.3                 | <0.0001        |
| HDL, mean (SD), mg/dl                              | 52.2 ± 14.5                  | 51.1 ± 14.8                  | 0.009          |
| Pooled cohort equation risk score, median (IQR), % | 7.0 (3.2-13.2)               | 9.2 (1.8-19.9)               | 0.0003         |
| Framingham risk score, median (IQR), %             | 3.1 (1.1-7.2)                | 3.5 (0.5-9.9)                | 0.79           |
| Coronary artery calcium score                      |                              |                              |                |
| Mean (SD)                                          | 105.1 ± 321.8                | 267.4 ± 701.7                |                |
| Median (IQR)                                       | 0 (0-47.5)                   | 11.1 (0-186.9)               | <0.0001        |
| N (%) with score >0                                | 756 (42.2)                   | 629 (57.5)                   | <0.0001        |
| N (%) with score >100                              | 327 (18.3)                   | 347 (31.7)                   | <0.0001        |
| Abdominal aortic calcium score                     |                              |                              |                |
| Mean (SD)                                          | 651.4 ± 1283.0               | 1206.3 ± 1926.3              |                |
| Median (IQR)                                       | 58.4 (0-660.5)               | 248.1(0-1644.5)              | <0.0001        |

|                         |             |            |       |
|-------------------------|-------------|------------|-------|
| N (%) with score >0     | 1145 (64.0) | 752 (68.7) | 0.009 |
| Incident CHD and stroke | 129 (4.6)   | 95 (4.9)   | 0.62  |

---

**Supplemental Table 2. Comparison of baseline characteristics by participation in CT scans.** Values are mean (standard deviation), median (interquartile range) or number (%). P values represent comparisons between participants who underwent CT versus participants who did not undergo CT. Abbreviations: body mass index, BMI; computed tomography, CT; high density lipoprotein, HDL; interquartile range, IQR; low density lipoprotein, LDL; standard deviation, SD.

|                                                    | <b>CT</b><br><b>n =1790</b> | <b>No CT</b><br><b>n = 1103</b> | <b>p value</b> |
|----------------------------------------------------|-----------------------------|---------------------------------|----------------|
| Age, mean (SD), years                              | 54.9 ± 8.9                  | 56.3 ± 10.1                     | 0.0003         |
| Female, N (%)                                      | 1199 (67.0)                 | 685 (62.1)                      | 0.008          |
| BMI, mean (SD), kg/m <sup>2</sup>                  | 31.9 ± 6.6                  | 33.4 ± 9.1                      | 0.01           |
| Current smoking, N (%)                             | 181 (10.1)                  | 192 (17.4)                      | <0.0001        |
| Hypertension, N (%)                                | 911 (50.9)                  | 635 (57.6)                      | 0.0005         |
| Diabetes, N (%)                                    | 243 (13.6)                  | 208 (18.9)                      | 0.0001         |
| Family history of premature heart disease, N (%)   | 445 (24.9)                  | 259 (23.7)                      | 0.44           |
| Antihypertensive therapy, N (%)                    | 829 (46.3)                  | 533 (48.3)                      | 0.29           |
| Total cholesterol, mean (SD), mg/dl                | 202.7 ± 39.4                | 201.7 ± 39.2                    | 0.47           |
| LDL, mean (SD), mg/dl                              | 130.2 ± 36.8                | 128.5 ± 36.0                    | 0.23           |
| HDL, mean (SD), mg/dl                              | 52.3 ± 14.5                 | 52.0 ± 14.7                     | 0.61           |
| Pooled cohort equation risk score, median (IQR), % | 6.2 (2.8-12.0)              | 8.4 (3.6-15.3)                  | <0.0001        |
| Framingham risk score, median (IQR), %             | 2.8 (0.9-6.5)               | 3.7 (1.3-8.5)                   | <0.0001        |

**Supplemental Table 3.** Reclassification tables for coronary and abdominal aortic vascular calcification as a function of 2013 ACC/AHA versus 2004 ATP-III statin eligibility.

**A. CAC present vs. absent**

| <b>CAC present (non-zero CAC;<br/>N=756)</b> |                     | Eligibility by 2013<br>ACC/AHA |                    | <b>CAC not present (CAC=0;<br/>N=1034)</b> |                     | Eligibility by 2013<br>ACC/AHA |                    |
|----------------------------------------------|---------------------|--------------------------------|--------------------|--------------------------------------------|---------------------|--------------------------------|--------------------|
|                                              |                     | Not statin<br>eligible         | Statin<br>eligible |                                            |                     | Not statin<br>eligible         | Statin<br>eligible |
| Eligibility by<br>2004 ATP-III               | Not statin eligible | 215                            | 240                | Eligibility by<br>2004 ATP-III             | Not statin eligible | 697                            | 168                |
|                                              | Statin eligible     | 15                             | 286                |                                            | Statin eligible     | 19                             | 150                |

**B. CAC  $\geq$ 100**

| <b>CAC <math>\geq</math>100 (N=327)</b> |                     | Eligibility by 2013<br>ACC/AHA |                    | <b>CAC &lt; 100 (N=1463)</b>   |                     | Eligibility by 2013<br>ACC/AHA |                    |
|-----------------------------------------|---------------------|--------------------------------|--------------------|--------------------------------|---------------------|--------------------------------|--------------------|
|                                         |                     | Not statin<br>eligible         | Statin<br>eligible |                                |                     | Not statin<br>eligible         | Statin<br>eligible |
| Eligibility by<br>2004 ATP-III          | Not statin eligible | 57                             | 110                | Eligibility by<br>2004 ATP-III | Not statin eligible | 855                            | 298                |
|                                         | Statin eligible     | 9                              | 151                |                                | Statin eligible     | 25                             | 285                |

**C. AAC present vs. absent**

| <b>AAC present (non-zero AAC;<br/>N=1145)</b> |                     | Eligibility by 2013<br>ACC/AHA |                    | <b>AAC not present (AAC=0;<br/>N=644)</b> |                     | Eligibility by 2013<br>ACC/AHA |                    |
|-----------------------------------------------|---------------------|--------------------------------|--------------------|-------------------------------------------|---------------------|--------------------------------|--------------------|
|                                               |                     | Not statin<br>eligible         | Statin<br>eligible |                                           |                     | Not statin<br>eligible         | Statin<br>eligible |
| Eligibility by<br>2004 ATP-III                | Not statin eligible | 411                            | 338                | Eligibility by<br>2004 ATP-III            | Not statin eligible | 501                            | 70                 |
|                                               | Statin eligible     | 27                             | 369                |                                           | Statin eligible     | 7                              | 66                 |

**Supplemental Table 4. Comparison of baseline characteristics by presence of CAC among ACC/AHA guideline statin eligible participants.** Values are mean (standard deviation), median (interquartile range) or number (%). P values represent comparisons between participants with and without CAC. Abbreviations: body mass index, BMI; coronary artery calcium, CAC; HDL; interquartile range, IQR; low density lipoprotein, LDL; standard deviation, SD.

|                                                    | <b>CAC &gt;0</b><br><b>n =526</b> | <b>CAC=0</b><br><b>n = 318</b> | <b>p value</b> |
|----------------------------------------------------|-----------------------------------|--------------------------------|----------------|
| Age, mean (SD), years                              | 61.6 ± 7.7                        | 58.1 ± 8.2                     | <0.0001        |
| Female, N (%)                                      | 305 (58.0)                        | 188 (59.1)                     | 0.75           |
| BMI, mean (SD), kg/m <sup>2</sup>                  | 31.6 ± 6.2                        | 31.4 ± 6.1                     | 0.71           |
| Current smoking, N (%)                             | 80 (15.2)                         | 34 (10.7)                      | 0.06           |
| Hypertension, N (%)                                | 379 (72.1)                        | 206 (64.8)                     | 0.03           |
| Diabetes, N (%)                                    | 147 (28.0)                        | 87 (27.4)                      | 0.85           |
| Family history of premature heart disease, N (%)   | 132 (25.1)                        | 67 (21.1)                      | 0.18           |
| Antihypertensive therapy, N (%)                    | 333 (63.3)                        | 197 (62.0)                     | 0.69           |
| Total cholesterol, mean (SD), mg/dl                | 216.9 ± 41.0                      | 210.8 ± 44.1                   | 0.04           |
| LDL, mean (SD), mg/dl                              | 143.3 ± 37.4                      | 139.2 ± 40.3                   | 0.14           |
| HDL, mean (SD), mg/dl                              | 50.5 ± 13.9                       | 50.8 ± 13.2                    | 0.73           |
| Pooled cohort equation risk score, median (IQR), % | 13.5 (9.9-19.2)                   | 10.3 (8.1-14.6)                | <0.0001        |
| Framingham risk score, median (IQR), %             | 6.9 (4.0-11.7)                    | 5.2 (2.8-8.8)                  | <0.0001        |

**Supplemental Figure 1.** Consort diagram

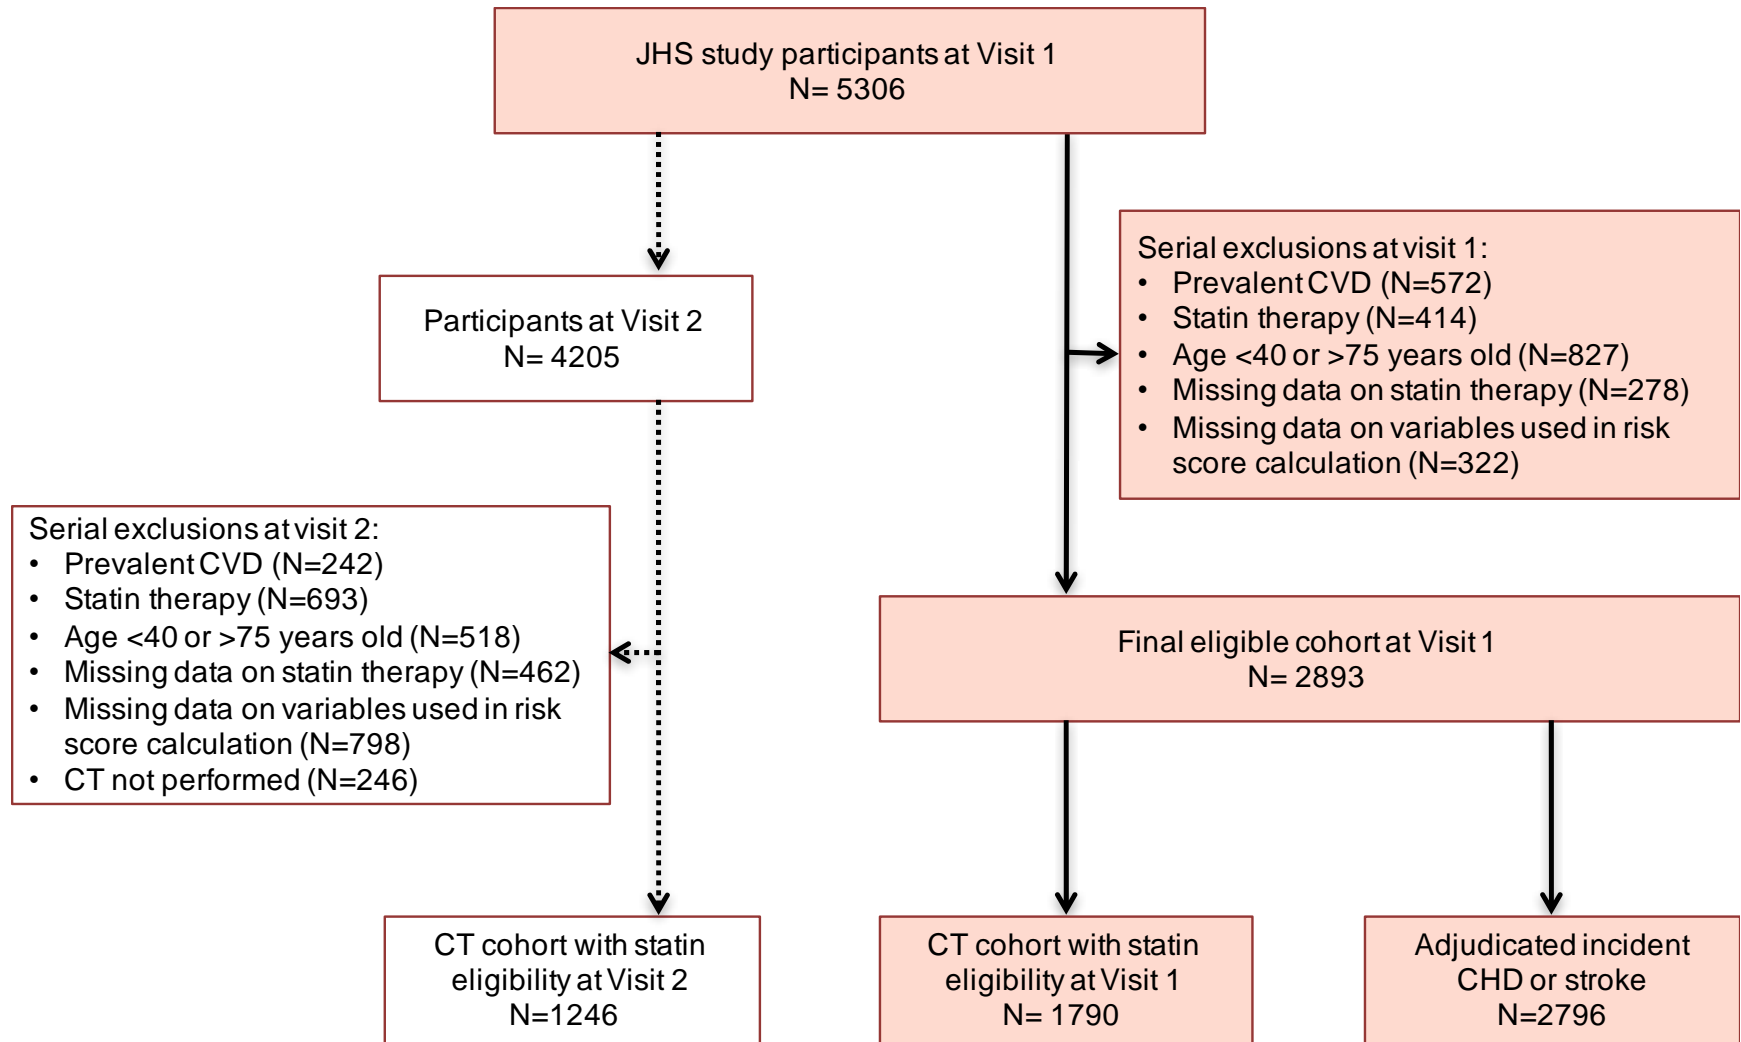

**Supplemental Figure 2.** Cumulative hazard functions for combined incident CHD and stroke corresponding to Cox models.

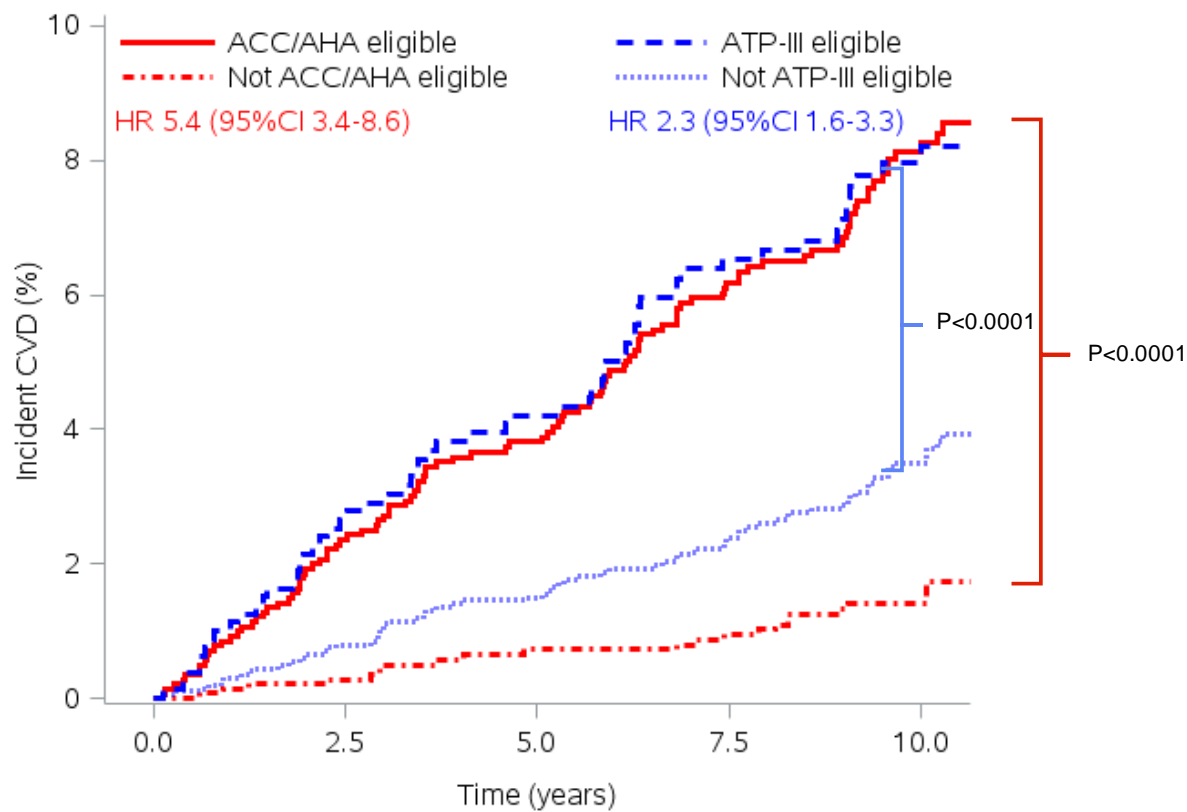

|                      |      |      |      |      |      |
|----------------------|------|------|------|------|------|
| Not ACC/AHA eligible | 1390 | 1382 | 1347 | 1314 | 682  |
| ACC/AHA eligible     | 1406 | 1355 | 1288 | 1183 | 703  |
| Not ATP-III eligible | 2003 | 1974 | 1913 | 1828 | 1001 |
| ATP-III eligible     | 793  | 763  | 722  | 669  | 384  |
